# Supplementary material for: A Low-Cost Electrochemical Method for the Determination of Sulfadiazine in Aquaculture Wastewater
Source: MDPI journal article supplement (doi:10.3390/ijerph192416945), 2022-12-16
Supplement: s1 [file s1]

## **Supplementary Information**

### **A low-cost electrochemical method for the determination of sulfadiazine in aquaculture wastewater**

Yang Liu <sup>1,2</sup>, Jianlei Chen <sup>2</sup>, Haiyan Hu <sup>3</sup>, Keming Qu <sup>2</sup>, Zhengguo Cui <sup>2,\*</sup>

1 Faculty of Fisheries, Zhejiang Ocean University, Zhoushan 316022, China

2 Key Laboratory of Sustainable Development of Marine Fisheries, Ministry of Agriculture and Rural Affairs, Yellow Sea Fisheries Research Institute, Chinese Academy of Fishery Sciences, Qingdao 266071, China

3 College of Marine Science and Technology, Zhejiang Ocean University, Zhoushan 316022, China

\*Correspondence: [cuizg@ysfri.ac.cn](mailto:cuizg@ysfri.ac.cn)

**Supporting Figures:**

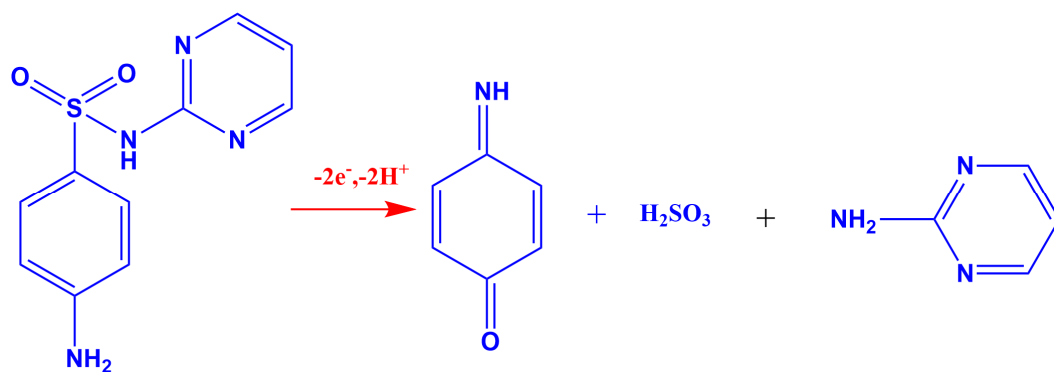

**Figure. S1.** Electrochemical oxidation mechanism of sulfadiazine.

## Tables

**Table S1.** Analytical data comparison between SDZ detection and previous electrodes.

| Electrode           | Electrolyte solution          | LOD                | Linear range           | Ref.      |
|---------------------|-------------------------------|--------------------|------------------------|-----------|
| GCE                 | 0.04 M B-R buffer<br>(pH 6.8) | 10.9 $\mu\text{M}$ | 62.7-340 $\mu\text{M}$ | [1]       |
| Carboxyl-MWCNTs/GCE | 0.04 M B-R buffer<br>(pH 2)   | 0.07 $\mu\text{M}$ | 0.50-110 $\mu\text{M}$ | [2]       |
| MIP/GO@COF/GCE      | 0.2 M PBS<br>(pH 7)           | 0.16 $\mu\text{M}$ | 0.5–200 $\mu\text{M}$  | [3]       |
| MWCNT-GCE           | 0.04 M B-R buffer<br>(pH 7)   | 7.1 $\mu\text{M}$  | 10-2000 $\mu\text{M}$  | [4]       |
| GCE                 | 0.1M ABS<br>(pH 4)            | 6.14 $\mu\text{M}$ | 20-300 $\mu\text{M}$   | This work |

(GCE, glassy carbon electrode; MWCNT, multiwalled carbon nanotube; MIP, molecularly imprinted polymer; GO@COF, grapheneoxide@covalentorganic framework; B-R buffer, Britton–Robinson buffer; PBS, phosphate buffer; ABS, acetic acid-sodium acetate buffer solution).

## Supporting references

1. Braga, O. C.; Campestrini, I.; Vieira, I. C.; Spinelli, A., Sulfadiazine determination in pharmaceuticals by electrochemical reduction on a glassy carbon electrode. *Journal of the Brazilian Chemical Society* **2010**, 21, 813-820.
2. He, B.-S.; Chen, W.-B., Voltammetric determination of sulfonamides with a modified glassy carbon electrode using carboxyl multiwalled carbon nanotubes. *Journal of the Brazilian Chemical Society* **2016**, 27, 2216-2225.
3. Sun, Y.; He, J.; Waterhouse, G. I. N.; Xu, L.; Zhang, H.; Qiao, X.; Xu, Z., A selective molecularly imprinted electrochemical sensor with GO@COF signal amplification for the simultaneous determination of sulfadiazine and acetaminophen. *Sensors and Actuators B: Chemical* **2019**, 300, 126993.
4. Fotouhi, L.; Hashkavayi, A. B.; Heravi, M. M., Electrochemical behaviour and voltammetric determination of sulphadiazine using a multi-walled carbon nanotube composite film-glassy carbon electrode. *Journal of Experimental Nanoscience* **2013**, 8, (7-8), 947-956.
